# Supplementary material
Source: PubMed Central journal article supplement (PMC141010)

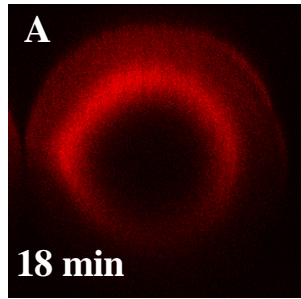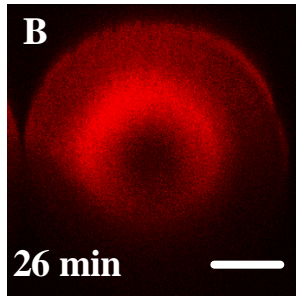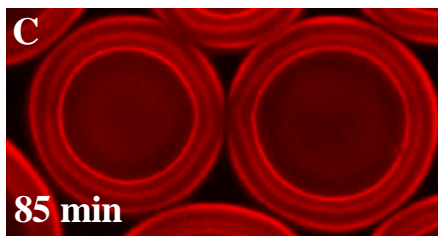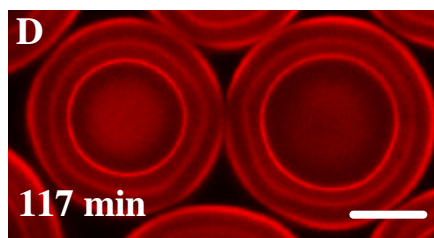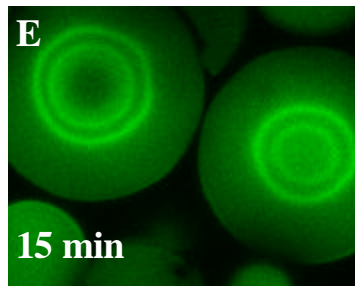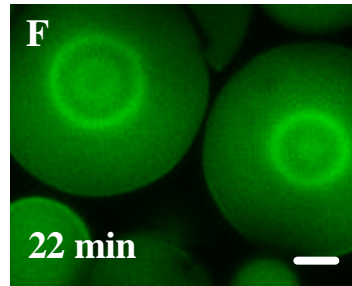

Supplement: pnas_0237084100_6.pdf [file pnas_0237084100_6.pdf]

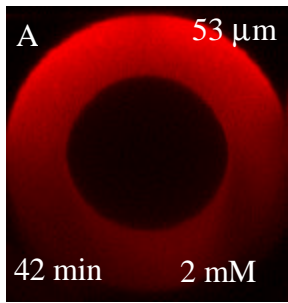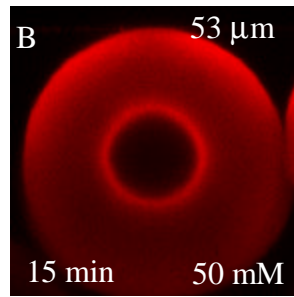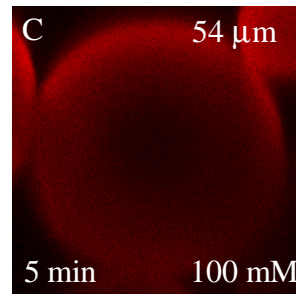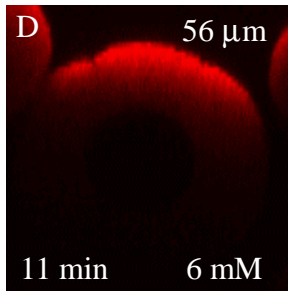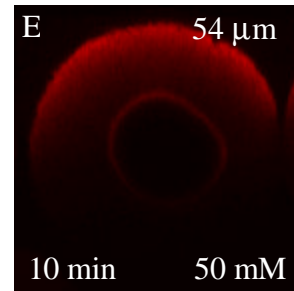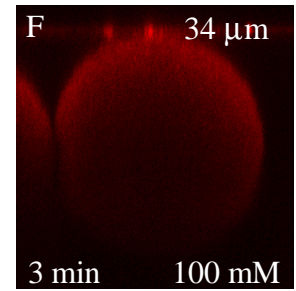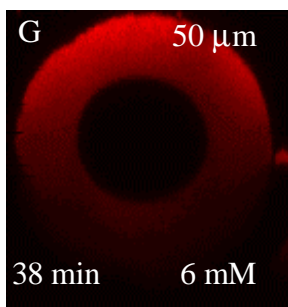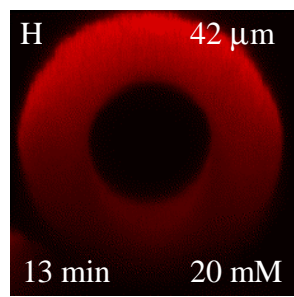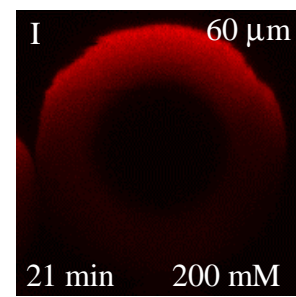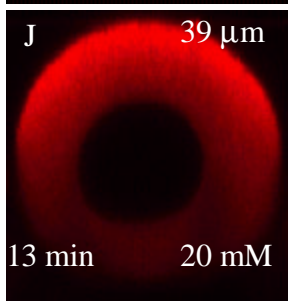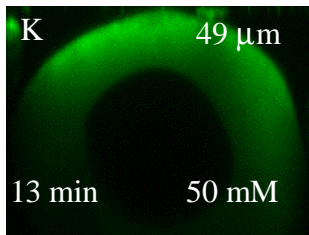

Supplement: pnas_0237084100_8.pdf [file pnas_0237084100_8.pdf]
